# Supplementary material
Source: PubMed Central journal article supplement (PMC6748641)
Supplement: NIHMS1049812-supplement-1.pdf [file NIHMS1049812-supplement-1.pdf]

## Supplemental Figure 1

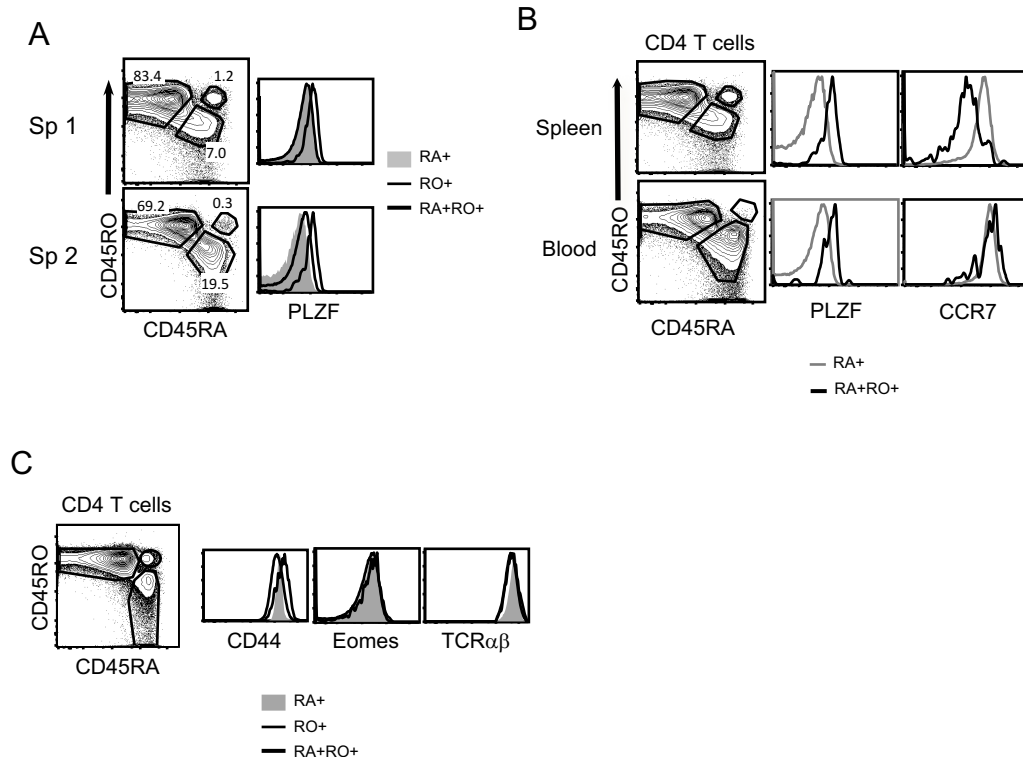

**Supplemental Figure 1. Temra-like PLZF<sup>+</sup> CD4 T cells are present in spleen but not blood.** (A) Total lymphocytes from spleens were analyzed for PLZF expression by flow cytometry after staining with surface antibodies followed by intra-nuclear staining of PLZF in CD45RA<sup>+</sup>, CD45RO<sup>+</sup> and CD45RA<sup>+</sup>RO<sup>+</sup> CD4 T cells. Total 3 spleens were examined and two are shown. (B) Total splenocytes and PBMCs were stained as in (A) and gated based on CD45RA and CD45RO to compare PLZF and CCR7 expression levels. (C) CD45RA<sup>+</sup>, CD45RO<sup>+</sup>, CD45RA<sup>+</sup>RO<sup>+</sup> CD4 T cells from spleen were analyzed for the expression of indicated molecules by flow cytometry after surface and intra-nuclear staining. 3 spleen samples were analyzed of which one representative is shown.

# Supplemental Figure 2

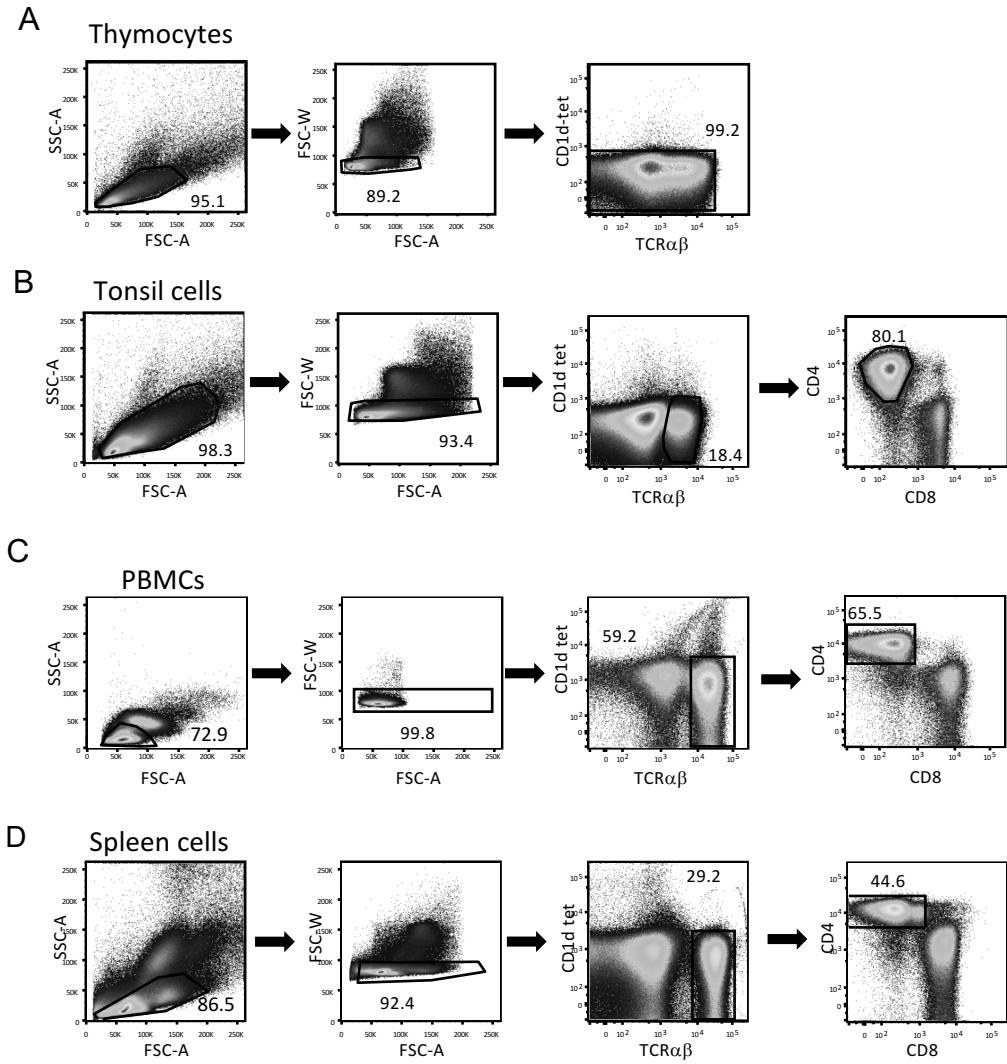

**Supplemental Figure 2. Gating strategy for flow cytometry.** Total cells from thymus (A), tonsil (B), peripheral blood mononuclear cells, PBMCs (C) and spleen (D) were analyzed by flow cytometry after staining with surface antibodies. Cells gated as shown in the preceding plot are shown for each dot plot.
